# Supplementary material for: Molecular Characterization of Ticks and Tick-Borne Pathogens in Cattle from Khartoum State and East Darfur State, Sudan
Source: MDPI journal article supplement (doi:10.3390/pathogens10050580), 2021-05-10
Supplement: s1 [file s1]

**Table S1.** Results of tick species identification based on mitochondrial 12S rDNA gene partial sequence.

| Tick 12S rDNA sequences |             | Blastn match |                  |              |                                      |
|-------------------------|-------------|--------------|------------------|--------------|--------------------------------------|
| Accession number        | Length (bp) | Identity (%) | Accession number | Source       | Tick species                         |
| LC612490                | 345         | 100%         | EU921773         | Egypt        | <i>Rhipicephalus annulatus</i>       |
| LC612491                | 345         | 100%         | EU921773         | Egypt        | <i>Rhipicephalus annulatus</i>       |
| LC612492                | 345         | 100%         | EU921773         | Egypt        | <i>Rhipicephalus annulatus</i>       |
| LC612493                | 345         | 100%         | EU921773         | Egypt        | <i>Rhipicephalus annulatus</i>       |
| LC612494                | 345         | 99.71%       | EU921773         | Egypt        | <i>Rhipicephalus annulatus</i>       |
| LC612495                | 345         | 100%         | EU921773         | Egypt        | <i>Rhipicephalus annulatus</i>       |
| LC612496                | 345         | 100%         | EU921773         | Egypt        | <i>Rhipicephalus annulatus</i>       |
| LC612501                | 340         | 100%         | KY676834         | Burkina Faso | <i>Rhipicephalus decoloratus</i>     |
| LC612502                | 340         | 100%         | KY676834         | Burkina Faso | <i>Rhipicephalus decoloratus</i>     |
| LC612503                | 340         | 100%         | KY676834         | Burkina Faso | <i>Rhipicephalus decoloratus</i>     |
| LC612504                | 340         | 100%         | KY676834         | Burkina Faso | <i>Rhipicephalus decoloratus</i>     |
| LC612505                | 340         | 100%         | KY676834         | Burkina Faso | <i>Rhipicephalus decoloratus</i>     |
| LC612506                | 340         | 100%         | KY676834         | Burkina Faso | <i>Rhipicephalus decoloratus</i>     |
| LC612507                | 340         | 100%         | KF569940         | Mali         | <i>Rhipicephalus decoloratus</i>     |
| LC612508                | 340         | 100%         | AF150044         | Zimbabwe     | <i>Rhipicephalus decoloratus</i>     |
| LC612476                | 344         | 99.41%       | MN315381         | Senegal      | <i>Rhipicephalus evertsi evertsi</i> |
| LC612477                | 344         | 99.41%       | MN315381         | Senegal      | <i>Rhipicephalus evertsi evertsi</i> |
| LC612478                | 344         | 99.41%       | MN315381         | Senegal      | <i>Rhipicephalus evertsi evertsi</i> |
| LC612479                | 344         | 99.41%       | MN315381         | Senegal      | <i>Rhipicephalus evertsi evertsi</i> |
| LC612480                | 344         | 99.41%       | MN315381         | Senegal      | <i>Rhipicephalus evertsi evertsi</i> |
| LC612481                | 344         | 99.41%       | MN315381         | Senegal      | <i>Rhipicephalus evertsi evertsi</i> |
| LC612483                | 344         | 99.12%       | MN315381         | Senegal      | <i>Rhipicephalus evertsi evertsi</i> |
| LC612517                | 339         | 97.94%       | KX377409         | Ethiopia     | <i>Rhipicephalus praetextatus</i>    |
| LC612518                | 339         | 97.94%       | KX377409         | Ethiopia     | <i>Rhipicephalus praetextatus</i>    |
| LC612519                | 339         | 97.94%       | KX377409         | Ethiopia     | <i>Rhipicephalus praetextatus</i>    |
| LC612520                | 339         | 97.64%       | KX377409         | Ethiopia     | <i>Rhipicephalus praetextatus</i>    |
| LC612523                | 339         | NA           | NA               | NA           | <i>Rhipicephalus simpsoni</i>        |
| LC612524                | 339         | NA           | NA               | NA           | <i>Rhipicephalus simpsoni</i>        |
| LC612470                | 341         | 100%         | MH094502         | Saudi Arabia | <i>Hyalomma rufipes</i>              |
| LC612471                | 341         | 99.40%       | MH094502         | Saudi Arabia | <i>Hyalomma rufipes</i>              |
| LC612472                | 340         | 98.11%       | AF031856         | Zimbabwe     | <i>Hyalomma rufipes</i>              |
| LC612473                | 341         | 99.70%       | MH094502         | Saudi Arabia | <i>Hyalomma rufipes</i>              |
| LC612474                | 341         | 100%         | MH094502         | Saudi Arabia | <i>Hyalomma rufipes</i>              |
| LC612475                | 341         | 100%         | MH094502         | Saudi Arabia | <i>Hyalomma rufipes</i>              |
| LC612442                | 335         | 99.11%       | KF583616         | China        | <i>Hyalomma anatolicum</i>           |
| LC612443                | 335         | 99.11%       | KF583616         | China        | <i>Hyalomma anatolicum</i>           |
| LC612444                | 335         | 99.11%       | KF583616         | China        | <i>Hyalomma anatolicum</i>           |
| LC612445                | 335         | 99.11%       | KF583616         | China        | <i>Hyalomma anatolicum</i>           |

|          |     |        |          |              |                             |
|----------|-----|--------|----------|--------------|-----------------------------|
| LC612446 | 335 | 99.11% | KF583616 | China        | <i>Hyalomma anatolicum</i>  |
| LC612447 | 335 | 99.11% | KF583616 | China        | <i>Hyalomma anatolicum</i>  |
| LC612448 | 335 | 99.11% | KF583616 | China        | <i>Hyalomma anatolicum</i>  |
| LC612449 | 335 | 99.11% | KF583616 | China        | <i>Hyalomma anatolicum</i>  |
| LC612450 | 335 | 99.11% | KF583616 | China        | <i>Hyalomma anatolicum</i>  |
| LC612451 | 335 | 99.11% | KF583616 | China        | <i>Hyalomma anatolicum</i>  |
| LC612452 | 336 | 98.22% | KF583616 | China        | <i>Hyalomma anatolicum</i>  |
| LC612453 | 325 | 98.15% | KT391040 | Israel       | <i>Hyalomma excavatum</i>   |
| LC612454 | 325 | 98.15% | KT391040 | Israel       | <i>Hyalomma excavatum</i>   |
| LC612455 | 325 | 98.15% | KT391040 | Israel       | <i>Hyalomma excavatum</i>   |
| LC612456 | 325 | 98.15% | KT391040 | Israel       | <i>Hyalomma excavatum</i>   |
| LC612457 | 337 | 98.81% | MH094491 | Saudi Arabia | <i>Hyalomma dromedarii</i>  |
| LC612458 | 338 | 99.70% | KX132904 | Niger        | <i>Hyalomma impeltatum</i>  |
| LC612459 | 338 | 99.70% | KX132904 | Niger        | <i>Hyalomma impeltatum</i>  |
| LC612460 | 338 | 99.40% | KX132904 | Niger        | <i>Hyalomma impeltatum</i>  |
| LC612461 | 338 | 99.40% | KX132904 | Niger        | <i>Hyalomma impeltatum</i>  |
| LC612462 | 338 | 99.40% | KX132904 | Niger        | <i>Hyalomma impeltatum</i>  |
| LC612463 | 338 | 99.40% | KX132904 | Niger        | <i>Hyalomma impeltatum</i>  |
| LC612464 | 338 | 99.70% | KX132904 | Niger        | <i>Hyalomma impeltatum</i>  |
| LC612465 | 327 | 100%   | MH061014 | Greece       | <i>Hyalomma marginatum</i>  |
| LC612466 | 327 | 100%   | MH061014 | Greece       | <i>Hyalomma marginatum</i>  |
| LC612467 | 327 | 100%   | MH061014 | Greece       | <i>Hyalomma marginatum</i>  |
| LC612468 | 327 | 100%   | MH061014 | Greece       | <i>Hyalomma marginatum</i>  |
| LC612469 | 327 | 100%   | MH061014 | Greece       | <i>Hyalomma marginatum</i>  |
| LC612433 | 306 | 98.37% | KP987776 | Israel       | <i>Amblyomma lepidum</i>    |
| LC612434 | 306 | 98.69% | KP987776 | Israel       | <i>Amblyomma lepidum</i>    |
| LC612435 | 306 | 98.04% | KP987776 | Israel       | <i>Amblyomma lepidum</i>    |
| LC612436 | 306 | 99.02% | KP987776 | Israel       | <i>Amblyomma lepidum</i>    |
| LC612437 | 306 | 99.02% | KP987776 | Israel       | <i>Amblyomma lepidum</i>    |
| LC612438 | 306 | 99.02% | KP987776 | Israel       | <i>Amblyomma lepidum</i>    |
| LC612439 | 306 | 98.69% | KP987776 | Israel       | <i>Amblyomma lepidum</i>    |
| LC612440 | 349 | 99.71% | MT906455 | Angola       | <i>Amblyomma variegatum</i> |
| LC612441 | 349 | 100%   | MT906455 | Angola       | <i>Amblyomma variegatum</i> |

NA: No mitochondrial 12S rDNA reference sequences for *R. simpsoni* are available in the GenBank.
